# Supplementary material
Source: PubMed Central journal article supplement (PMC6142941)
Supplement: jamaophthalmol-e182062-s001.pdf [file jamaophthalmol-e182062-s001.pdf]

## Supplementary Online Content

Matsa E, Shi J, Wheeler KK, McCarthy T, McGregor ML, Leonard JC. Trends in US emergency department visits for pediatric acute ocular injury. *JAMA Ophthalmol*. Published online June 7, 2018. doi:10.1001/jamaophthalmol.2018.2062

**eTable 1.** International Classification of Diseases, Ninth Revision, Clinical Modification Diagnosis Codes Used to Identify Acute Ocular Injury

**eTable 2.** International Classification of Diseases, Ninth Revision, Clinical Modification External-Cause-of-Injury Codes Used to Classify Mechanism of Injury

**eTable 3.** Mechanism of Injury Categories and Hierarchy

**eTable 4.** Stratification of Acute Ocular Injury International Classification of Diseases, Ninth Revision, Clinical Modification Diagnosis Codes by Risk of Vision Loss

**eTable 5.** Mechanisms of Pediatric Acute Ocular Injuries by Risk of Vision Loss, National Estimates, NEDS 2006-2014

**eTable 6.** Mechanisms of Pediatric Acute Ocular Injuries by Age Group, National Estimates, NEDS 2006-2014

This supplementary material has been provided by the authors to give readers additional information about their work.

### Supplement

**eTable 1. International Classification of Diseases, Ninth Revision, Clinical Modification Diagnosis Codes used to identify acute ocular injury**

|                                          | ICD-9 Category                                              | ICD-9 Codes                                                                 |
|------------------------------------------|-------------------------------------------------------------|-----------------------------------------------------------------------------|
| Acute eye injury                         | Traumatic glaucoma                                          | 365.65                                                                      |
|                                          | Traumatic cataract                                          | 366.20-366.22                                                               |
|                                          | Other disorders of eyelid (retained foreign body of eyelid) | 374.86                                                                      |
|                                          | Orbital floor fracture                                      | 802.6, 802.7                                                                |
|                                          | Open wound of ocular adnexa                                 | 870.0-870.9                                                                 |
|                                          | Open wound of eyeball                                       | 871.0-871.9                                                                 |
|                                          | Superficial wound of eye and adnexa                         | 918.0, 918.1, 918.2, 918.9                                                  |
|                                          | Contusion of eye and adnexa                                 | 921.1-921.3, 921.9                                                          |
|                                          | Burn confined to eye and adnexa                             | 940.0-940.9                                                                 |
|                                          | Burn of face, head, and neck (including eye)                | 941.02, 941.12, 941.22, 941.32                                              |
| Acute eye injury when paired with E-Code | Disorders of the globe                                      | 360.00-360.02, 360.30, 360.31, 360.34, 360.44, 361.01-361.05                |
|                                          | Retinal detachments & defects                               | 361.10, 361.11, 361.32, 361.33, 361.81, 361.89, 361.9                       |
|                                          | Other retinal disorders                                     | 362.30-362.37, 362.40, 362.43, 362.54, 362.81, 363.61-363.63                |
|                                          | Chorioretinal inflammations, scars, and other disorders     | 363.70, 363.72                                                              |
|                                          | Disorders of iris & ciliary body                            | 364.00, 364.04, 364.05, 364.23, 364.41, 364.75, 364.76                      |
|                                          | Glaucoma                                                    | 365.20, 365.61                                                              |
|                                          | Cataract                                                    | 366.01, 366.02                                                              |
|                                          | Keratitis                                                   | 370.20, 370.21                                                              |
|                                          | Corneal opacity and other disorders of the cornea           | 371.00-371.03, 371.10, 371.20, 371.22, 371.31-371.33, 371.70, 371.89, 371.9 |
|                                          | Disorders of conjunctiva                                    | 372.71-372.73                                                               |
|                                          | Inflammation of eyelids                                     | 373.13                                                                      |
|                                          | Other disorders of eyelids                                  | 374.30, 374.81, 374.82                                                      |
|                                          | Disorders of lacrimal system                                | 375.16, 375.20, 375.22, 375.51, 375.69, 375.89, 375.9                       |
|                                          | Disorders of the orbit                                      | 376.30, 376.32, 376.33, 376.36, 376.40, 376.47, 376.52, 376.89, 376.9       |
|                                          | Disorders of optic nerve and visual pathways                | 377.42                                                                      |
|                                          | Strabismus and other disorders of binocular eye movements   | 378.60                                                                      |
|                                          | Other disorders of the eye                                  | 379.23, 379.32, 379.33, 379.39, 379.8, 379.91, 379.92, 379.93               |
|                                          | Contusion of eye and adnexa                                 | 921.0                                                                       |
|                                          | Foreign body on external eye                                | 930.0, 930.1, 930.2, 930.8, 930.9                                           |
|                                          | Injury to optic nerve and pathways                          | 950.0                                                                       |

**eTable 2. International Classification of Diseases, Ninth Revision, Clinical Modification External-Cause-of-Injury Codes used to classify mechanism of injury**

| <b>E-code category</b> | <b>E-code subcategory</b>           | <b>E-codes</b>                                                                                                                                                                                                                                                                                                                                                                                                                                                               |
|------------------------|-------------------------------------|------------------------------------------------------------------------------------------------------------------------------------------------------------------------------------------------------------------------------------------------------------------------------------------------------------------------------------------------------------------------------------------------------------------------------------------------------------------------------|
| Sports <sup>a</sup>    | Road                                | E0010: Walking/marching/hiking<br>E0011: Running<br>E0060: Roller skate/ skateboarding<br>E0064: Bike riding<br>E0065: Jumping rope<br>E0066: Non-running track/field                                                                                                                                                                                                                                                                                                        |
|                        | Water                               | E0020: Swimming<br>E0022: Water polo<br>E0023: Water aerobics/exercise<br>E0024: Underwater dive/snorkel<br>E0026: Water ski/wake boarding<br>E0027: Surf/ windsurf/ boogie boarding<br>E0028: Water sliding<br>E0029: Water/watercraft                                                                                                                                                                                                                                      |
|                        | Winter                              | E0030: Ice Skating<br>E0031: Ice hockey<br>E0032: Ski/snowboard/sled/toboggan<br>E0033: Cross country skiing<br>E0039: Ice and snow                                                                                                                                                                                                                                                                                                                                          |
|                        | Sports from height                  | E0021: Springboard/platform dive<br>E0040: Mountain/rock/wall climb<br>E0041: Rappelling<br>E0042: BASE jumping<br>E0043: Bungee jumping<br>E0049: Climb/rappel/jump off                                                                                                                                                                                                                                                                                                     |
|                        | Dance / Sports from moderate height | E0050: Dancing<br>E0052: Gymnastics<br>E0053: Trampoline<br>E0054: Cheerleading<br>E0059: Dancing/ rhythm movements                                                                                                                                                                                                                                                                                                                                                          |
|                        | Ball                                | E0063: Bowling<br>E0070: Tackle football<br>E0071: American flag/touch football<br>E0072: Rugby<br>E0075: Soccer<br>E0076: Basketball<br>E0077: Volleyball (beach/ court)                                                                                                                                                                                                                                                                                                    |
|                        | Ball and stick/racquet              | E0062: Golf<br>E0073: Baseball<br>E0074: Lacrosse/ field hockey<br>E0082: Racquet/hand sports                                                                                                                                                                                                                                                                                                                                                                                |
|                        | Other                               | E0061: Horseback riding<br>E0069: Individual sports/athletics<br>E0078: School recess/camp<br>E0079: Team sports/athletics<br>E0080: Boxing<br>E0081: Wrestling<br>E0083: Frisbee<br>E0084: Martial arts<br>E0089: Sports/ athletics not elsewhere classified<br>E0090: Exercise machine<br>E0091: Calisthenics<br>E0092: Aerobic/ step exercise<br>E0093: Circuit training<br>E0099: Cardio-respiratory exercise not elsewhere classified<br>E0100: Muscle strength machine |

|                        |                                                           |                                                                                                                                                                                                                                                                                                                                                                                                                                                                                                                                                                                                                                                                                                                                                                                                                                                                                                                                                                                                                                                                                     |
|------------------------|-----------------------------------------------------------|-------------------------------------------------------------------------------------------------------------------------------------------------------------------------------------------------------------------------------------------------------------------------------------------------------------------------------------------------------------------------------------------------------------------------------------------------------------------------------------------------------------------------------------------------------------------------------------------------------------------------------------------------------------------------------------------------------------------------------------------------------------------------------------------------------------------------------------------------------------------------------------------------------------------------------------------------------------------------------------------------------------------------------------------------------------------------------------|
|                        |                                                           | <p>E0101: Push-ups/ pull-ups/ sit-ups<br/> E0102: Free weights<br/> E0109: Muscle strength exercise not elsewhere classified<br/> E0290: Refereeing sports<br/> E0291: Spectator at event<br/> E0292: Rough housing/horseplay<br/> E0299: Activity not elsewhere classified<br/> E030 : Activity not otherwise specified</p>                                                                                                                                                                                                                                                                                                                                                                                                                                                                                                                                                                                                                                                                                                                                                        |
| Household/<br>Domestic | Home activities <sup>a</sup>                              | <p>E0122: Furniture build/finish<br/> E0129: Arts &amp; handcrafts not elsewhere classified<br/> E0130: Personal bathing/shower<br/> E0131: Laundry<br/> E0132: Vacuuming<br/> E0134: Floor mopping/cleaning<br/> E0135: Residential relocation<br/> E0138: Personal hygiene not elsewhere classified<br/> E0139: Household maintenance not elsewhere classified<br/> E0140: Caregiving-bathing<br/> E0141: Caregiving-lifting<br/> E0149: Caregiving not elsewhere classified<br/> E0150: Food preparation &amp; clean-up<br/> E0151: Grilling &amp; smoking food<br/> E0152: Cooking &amp; baking<br/> E0159: Cooking &amp; grilling not elsewhere classified<br/> E0160: Digging/ shovel/ rake<br/> E0161: Gardening/landscaping<br/> E0162: Building &amp; construction<br/> E0169: Land maintain/construction not elsewhere classified<br/> E0181: Drum/percussion playing<br/> E0182: String instrument play</p>                                                                                                                                                              |
|                        | Animal care                                               | <p>E0190: Walking an animal<sup>a</sup><br/> E0191: Milking an animal<sup>a</sup><br/> E0192: Groom/shearing animal<sup>a</sup><br/> E0199: Animal care not elsewhere classified<sup>a</sup><br/> E9068: Injury not elsewhere classified caused by animal<br/> E9069: Injury not otherwise specified caused by animal</p>                                                                                                                                                                                                                                                                                                                                                                                                                                                                                                                                                                                                                                                                                                                                                           |
| Vehicles               | Motor vehicle accident<br>injuring automobile<br>occupant | <p>E8100: Motor vehicle collision with train, driver injured<br/> E8101: Motor vehicle collision with train, passenger injured<br/> E8110: Re-entrant motor vehicle collision, driver injured<br/> E8111: Re-entrant motor vehicle collision, passenger injured<br/> E8120: Motor vehicle collision not otherwise specified, driver injured<br/> E8121: Motor vehicle collision not otherwise specified, passenger injured<br/> E8130: Motor vehicle- other vehicle collision, driver injured<br/> E8131: Motor vehicle- other vehicle collision, passenger injured<br/> E8140: Motor vehicle collision with pedestrian, driver injured<br/> E8141: Motor vehicle collision with pedestrian, passenger injured<br/> E8150: Motor vehicle collision with other object, passenger injured<br/> E8151: Motor vehicle collision with other object, passenger injured<br/> E8160: Loss control of motor vehicle accident, driver injured<br/> E8161: Loss control of motor vehicle accident, passenger injured<br/> E8170: Motor vehicle accident boarding/alighting, driver injured</p> |

|  |                      |                                                                                                                                                                                                                                                                                                                                                                                                                                                                                                                                                                                                                                                                                                                                                                                                                                                                                                                                                                                                                                                                                                                                                                                                                                                                                                                                                                                                                                                                                                                                                                                                                                                                                                                                                                                  |
|--|----------------------|----------------------------------------------------------------------------------------------------------------------------------------------------------------------------------------------------------------------------------------------------------------------------------------------------------------------------------------------------------------------------------------------------------------------------------------------------------------------------------------------------------------------------------------------------------------------------------------------------------------------------------------------------------------------------------------------------------------------------------------------------------------------------------------------------------------------------------------------------------------------------------------------------------------------------------------------------------------------------------------------------------------------------------------------------------------------------------------------------------------------------------------------------------------------------------------------------------------------------------------------------------------------------------------------------------------------------------------------------------------------------------------------------------------------------------------------------------------------------------------------------------------------------------------------------------------------------------------------------------------------------------------------------------------------------------------------------------------------------------------------------------------------------------|
|  |                      | <p>E8171: Motor vehicle accident boarding/alighting, passenger injured</p> <p>E8180: Motor vehicle traffic accident not elsewhere classified, driver injured</p> <p>E8181: Motor vehicle traffic accident not elsewhere classified, passenger injured</p> <p>E8190: Traffic accident not otherwise specified, driver injured</p> <p>E8191: Traffic accident not otherwise specified, passenger injured</p> <p>E8220: Other collision with moving object, driver injured</p> <p>E8221: Other collision with moving object, passenger injured</p> <p>E8230: Other collision with standing object, driver injured</p> <p>E8231: Other collision with standing object, passenger injured</p> <p>E8240: Non-traffic boarding/ alighting, driver injured</p> <p>E8241: Non-traffic boarding/ alighting, passenger injured</p> <p>E8250: Motor vehicle, non-traffic accident not elsewhere classified, driver injured</p> <p>E8251: Motor vehicle, non-traffic accident not elsewhere classified, passenger injured</p> <p>E9585: Self-inflicted injury crashing motor vehicle</p>                                                                                                                                                                                                                                                                                                                                                                                                                                                                                                                                                                                                                                                                                                      |
|  | Hit by motor vehicle | <p>E8102: Motorcycle versus train collision</p> <p>E8112: Motorcycle re-entrant collision</p> <p>E8122: Motor vehicle collision not otherwise specified, motorcycle driver injured</p> <p>E8123: Motor vehicle collision not otherwise specified, motorcycle passenger injured</p> <p>E8126: Motor vehicle collision not otherwise specified, cyclist injured</p> <p>E8127: Motor vehicle collision not otherwise specified, pedestrian injured</p> <p>E8128: Motor vehicle collision not otherwise specified, injured person not elsewhere classified</p> <p>E8129: Motor vehicle collision not otherwise specified, injured person not otherwise specified</p> <p>E8132: Other motor vehicle collision, motorcycle driver injured</p> <p>E8133: Other motor vehicle collision, motorcycle passenger injured</p> <p>E8134: Other motor vehicle collision, occupant of street car injured</p> <p>E8135: Other motor vehicle collision, animal rider injured</p> <p>E8136: Other motor vehicle collision, cyclist injured</p> <p>E8137: Other motor vehicle collision, pedestrian injured</p> <p>E8138: Other motor vehicle collision, injured person not elsewhere classified</p> <p>E8139: Other motor vehicle collision , injured person not otherwise specified</p> <p>E8142: Motorcycle collision, pedestrian injured</p> <p>E8146: Motor vehicle collision, cyclist injured</p> <p>E8147: Motor vehicle collision, pedestrian injured</p> <p>E8148: Motor vehicle collision with pedestrian, injured person not elsewhere classified</p> <p>E8149: Motor vehicle collision with pedestrian, injured person not otherwise specified</p> <p>E8152: Motorcycle collision with object, motorcycle driver injured</p> <p>E8153: Motorcycle collision with object, motorcycle</p> |

|  |  |                                                                                                                                                                                                                                                                                                                                                                                                                                                                                                                                                                                                                                                                                                                                                                                                                                                                                                                                                                                                                                                                                                                                                                                                                                                                                                                                                                                                                                                                                                                                                                                                                                                                                                                                                                                                                                                                                                                                                                                                                                                                                                                                                                                                                                                                                                                                                                                                                                                                                                                                                                                                     |
|--|--|-----------------------------------------------------------------------------------------------------------------------------------------------------------------------------------------------------------------------------------------------------------------------------------------------------------------------------------------------------------------------------------------------------------------------------------------------------------------------------------------------------------------------------------------------------------------------------------------------------------------------------------------------------------------------------------------------------------------------------------------------------------------------------------------------------------------------------------------------------------------------------------------------------------------------------------------------------------------------------------------------------------------------------------------------------------------------------------------------------------------------------------------------------------------------------------------------------------------------------------------------------------------------------------------------------------------------------------------------------------------------------------------------------------------------------------------------------------------------------------------------------------------------------------------------------------------------------------------------------------------------------------------------------------------------------------------------------------------------------------------------------------------------------------------------------------------------------------------------------------------------------------------------------------------------------------------------------------------------------------------------------------------------------------------------------------------------------------------------------------------------------------------------------------------------------------------------------------------------------------------------------------------------------------------------------------------------------------------------------------------------------------------------------------------------------------------------------------------------------------------------------------------------------------------------------------------------------------------------------|
|  |  | passenger injured<br>E8156: Motor vehicle collision with object, cyclist injured<br>E8157: Motor vehicle collision with object, pedestrian injured<br>E8158: Motor vehicle collision with object, injured person not elsewhere classified<br>E8159: Motor vehicle collision with object, injured person not otherwise specified<br>E8162: Loss control of motor vehicle, motorcycle driver injured<br>E8163: Loss control of motor vehicle, motorcycle passenger injured<br>E8166: Loss control of motor vehicle, cyclist injured<br>E8167: Loss control of motor vehicle, pedestrian injured<br>E8168: Loss control of motor vehicle, injured person not elsewhere classified<br>E8169: Loss control of motor vehicle, injured person not otherwise specified<br>E8173: Motor vehicle boarding/alighting, motorcycle passenger injured<br>E8174: Motor vehicle boarding/alighting, street car occupant injured<br>E8175: Motor vehicle boarding/alighting, injured animal rider<br>E8177: Motor vehicle boarding/alighting, injured pedestrian<br>E8178: Motor vehicle boarding/alighting, injured person not elsewhere classified<br>E8179: Motor vehicle boarding/alighting, person not otherwise specified<br>E8182: Motor vehicle traffic accident not elsewhere classified, motorcycle driver injured<br>E8183: Motor vehicle traffic accident not elsewhere classified, motorcycle passenger injured<br>E8186: Motor vehicle traffic accident not elsewhere classified, cyclist injured<br>E8187: Motor vehicle traffic accident not elsewhere classified, pedestrian injured<br>E8188: Motor vehicle traffic accident not elsewhere classified, injured person not elsewhere classified<br>E8189: Motor vehicle traffic accident not elsewhere classified, injured person not otherwise specified<br>E8192: Traffic accident not otherwise specified, motorcycle driver injured<br>E8193: Traffic accident not otherwise specified, motorcycle passenger injured<br>E8195: Traffic accident not otherwise specified, animal rider injured<br>E8196: Traffic accident not otherwise specified, cyclist injured<br>E8197: Traffic accident not otherwise specified, pedestrian injured<br>E8198: Traffic accident not otherwise specified, injured person not elsewhere classified<br>E8199: Traffic accident not otherwise specified, injured person not otherwise specified<br>E8222: Other collision with moving object, motorcycle driver injured<br>E8224: Other collision with moving object, street car occupant injured<br>E8226: Other collision with moving object, cyclist injured |
|--|--|-----------------------------------------------------------------------------------------------------------------------------------------------------------------------------------------------------------------------------------------------------------------------------------------------------------------------------------------------------------------------------------------------------------------------------------------------------------------------------------------------------------------------------------------------------------------------------------------------------------------------------------------------------------------------------------------------------------------------------------------------------------------------------------------------------------------------------------------------------------------------------------------------------------------------------------------------------------------------------------------------------------------------------------------------------------------------------------------------------------------------------------------------------------------------------------------------------------------------------------------------------------------------------------------------------------------------------------------------------------------------------------------------------------------------------------------------------------------------------------------------------------------------------------------------------------------------------------------------------------------------------------------------------------------------------------------------------------------------------------------------------------------------------------------------------------------------------------------------------------------------------------------------------------------------------------------------------------------------------------------------------------------------------------------------------------------------------------------------------------------------------------------------------------------------------------------------------------------------------------------------------------------------------------------------------------------------------------------------------------------------------------------------------------------------------------------------------------------------------------------------------------------------------------------------------------------------------------------------------|

|  |                                   |                                                                                                                                                                                                                                                                                                                                                                                                                                                                                                                                                                                                                                                                                                                                                                                                                                                                                                                                                                                                                                                                                                                                                                                                                                                                                                                                                                                                                                                               |
|--|-----------------------------------|---------------------------------------------------------------------------------------------------------------------------------------------------------------------------------------------------------------------------------------------------------------------------------------------------------------------------------------------------------------------------------------------------------------------------------------------------------------------------------------------------------------------------------------------------------------------------------------------------------------------------------------------------------------------------------------------------------------------------------------------------------------------------------------------------------------------------------------------------------------------------------------------------------------------------------------------------------------------------------------------------------------------------------------------------------------------------------------------------------------------------------------------------------------------------------------------------------------------------------------------------------------------------------------------------------------------------------------------------------------------------------------------------------------------------------------------------------------|
|  |                                   | <p>E8227: Other collision with moving object, pedestrian injured</p> <p>E8232: Other collision with standing object, motorcycle driver injured</p> <p>E8236: Other collision with standing object, cyclist injured</p> <p>E8237: Other collision with standing object, pedestrian injured</p> <p>E8238: Other collision with standing object, injured person not elsewhere classified</p> <p>E8239: Other collision with standing object, injured person not otherwise specified</p> <p>E8242: Non-traffic boarding/alighting, motorcycle driver injured</p> <p>E8243: Non-traffic boarding/alighting, motorcycle passenger injured</p> <p>E8248: Non-traffic boarding/alighting, injured person not elsewhere classified</p> <p>E8249: Non-traffic boarding/alighting, injured person not otherwise specified</p> <p>E8252: Motor vehicle non-traffic accident not elsewhere classified, motorcycle driver injured</p> <p>E8253: Motor vehicle non-traffic accident not elsewhere classified, motorcycle passenger injured</p> <p>E8256: Motor vehicle non-traffic accident not elsewhere classified, cyclist injured</p> <p>E8257: Motor vehicle non-traffic accident not elsewhere classified, pedestrian injured</p> <p>E8258: Motor vehicle non-traffic accident not elsewhere classified, injured person not elsewhere classified</p> <p>E8259: Motor vehicle non-traffic accident not elsewhere classified, injured person not otherwise specified</p> |
|  | Non-motorized vehicle accidents   | <p>E8260: Cycling accident, pedestrian injured</p> <p>E8261: Cycling accident, cyclist injured</p> <p>E8262: Cycling accident, animal rider injured</p> <p>E8268: Cycling accident, injured person not elsewhere classified</p> <p>E8269: Cycling accident, injured person not otherwise specified</p> <p>E8270: Animal drawn vehicle accident, pedestrian injured</p> <p>E8272: Animal drawn vehicle accident, animal rider injured</p> <p>E8273: Animal drawn vehicle accident, vehicle occupant injured</p> <p>E8280: Ridden animal accident, pedestrian injured</p> <p>E8282: Ridden animal accident, rider injured</p> <p>E8288: Ridden animal accident, injured person not elsewhere classified</p> <p>E8289: Ridden animal accident, injured person not otherwise specified</p>                                                                                                                                                                                                                                                                                                                                                                                                                                                                                                                                                                                                                                                                        |
|  | Other motorized vehicle accidents | <p>E0025: Rowboat/ canoe/ kayak/ raft/ inner tube*</p> <p>E8012: Railroad collision with other object, pedestrian injured</p> <p>E8021: Railroad accident with derailling, passenger injured</p> <p>E8059: Hit by train, injured person not otherwise specified</p> <p>E8062: Railroad accident not elsewhere classified, injured pedestrian</p> <p>E8071: Railroad accident not otherwise specified, passenger injured</p> <p>E8072: Railroad accident not otherwise specified, pedestrian injured</p> <p>E8200: Snow vehicle accident, driver injured</p>                                                                                                                                                                                                                                                                                                                                                                                                                                                                                                                                                                                                                                                                                                                                                                                                                                                                                                   |

|  |  |                                                                                                                                                                                                                                                                                                                                                                                                                                                                                                                                                                                                                                                                                                                                                                                                                                                                                                                                                                                                                                                                                                                                                                                                                                                                                                                                                                                                                                                                                                                                                                                                                                                                                                                                                                                                                                                                                                                                                                                                                                                                                                                                                                                                                                                                                                                                                                                                                                                                                                                                                                                                                                                                                                                                                      |
|--|--|------------------------------------------------------------------------------------------------------------------------------------------------------------------------------------------------------------------------------------------------------------------------------------------------------------------------------------------------------------------------------------------------------------------------------------------------------------------------------------------------------------------------------------------------------------------------------------------------------------------------------------------------------------------------------------------------------------------------------------------------------------------------------------------------------------------------------------------------------------------------------------------------------------------------------------------------------------------------------------------------------------------------------------------------------------------------------------------------------------------------------------------------------------------------------------------------------------------------------------------------------------------------------------------------------------------------------------------------------------------------------------------------------------------------------------------------------------------------------------------------------------------------------------------------------------------------------------------------------------------------------------------------------------------------------------------------------------------------------------------------------------------------------------------------------------------------------------------------------------------------------------------------------------------------------------------------------------------------------------------------------------------------------------------------------------------------------------------------------------------------------------------------------------------------------------------------------------------------------------------------------------------------------------------------------------------------------------------------------------------------------------------------------------------------------------------------------------------------------------------------------------------------------------------------------------------------------------------------------------------------------------------------------------------------------------------------------------------------------------------------------|
|  |  | <p>E8201: Snow vehicle accident, passenger injured</p> <p>E8207: Snow vehicle accident, pedestrian injured</p> <p>E8208: Snow vehicle accident, injured person not elsewhere classified</p> <p>E8209: S Snow vehicle accident, injured person not otherwise specified</p> <p>E8210: Other off road motor vehicle accident, driver injured</p> <p>E8211: Other off road motor vehicle accident, passenger injured</p> <p>E8212: Other off road motor vehicle accident, motorcycle driver injured</p> <p>E8213: Other off road motor vehicle accident, motorcycle passenger injured</p> <p>E8214: Other off road motor vehicle accident, street car occupant injured</p> <p>E8216: Other off road motor vehicle accident, cyclist injured</p> <p>E8217: Other off road motor vehicle accident, pedestrian injured</p> <p>E8218: Other off road motor vehicle accident, injured person not elsewhere classified</p> <p>E8219: Other off road motor vehicle accident, injured person not otherwise specified</p> <p>E8290: Other road vehicle accident, pedestrian injured</p> <p>E8294: Other road vehicle accident, street car occupant injured</p> <p>E8298: Other road vehicle accident, injured person not elsewhere classified</p> <p>E8299: Other road vehicle accident, injured person not otherwise specified</p> <p>E8311: Power boat accident, boat occupant injured</p> <p>E8312: Power boat accident, crew member injured</p> <p>E8313: Power boat accident, passenger injured</p> <p>E8314: Power boat accident, skier injured</p> <p>E8318: Power boat injury not elsewhere classified, injured person not elsewhere classified</p> <p>E8321: Submersion not elsewhere classified, boat occupant injured</p> <p>E8323: Submersion not elsewhere classified, passenger injured</p> <p>E8341: Fall from a watercraft not elsewhere classified, boat occupant injured</p> <p>E8342: Fall from a watercraft not elsewhere classified, crew member injured</p> <p>E8343: Fall from a watercraft not elsewhere classified, passenger injured</p> <p>E8344: Fall from a watercraft not elsewhere classified, skier injured</p> <p>E8345: Fall from a watercraft not elsewhere classified, swimmer injured</p> <p>E8346: Fall from a watercraft not elsewhere classified, docker injured</p> <p>E8348: Fall from a watercraft not elsewhere classified, injured person not elsewhere classified</p> <p>E8349: Fall from a watercraft not elsewhere classified, injured person not otherwise specified</p> <p>E8351: Fall from a watercraft not otherwise specified, boat occupant injured</p> <p>E8353: Fall from a watercraft not otherwise specified, passenger injured</p> <p>E8354: Fall from a watercraft not otherwise specified, skier</p> |
|--|--|------------------------------------------------------------------------------------------------------------------------------------------------------------------------------------------------------------------------------------------------------------------------------------------------------------------------------------------------------------------------------------------------------------------------------------------------------------------------------------------------------------------------------------------------------------------------------------------------------------------------------------------------------------------------------------------------------------------------------------------------------------------------------------------------------------------------------------------------------------------------------------------------------------------------------------------------------------------------------------------------------------------------------------------------------------------------------------------------------------------------------------------------------------------------------------------------------------------------------------------------------------------------------------------------------------------------------------------------------------------------------------------------------------------------------------------------------------------------------------------------------------------------------------------------------------------------------------------------------------------------------------------------------------------------------------------------------------------------------------------------------------------------------------------------------------------------------------------------------------------------------------------------------------------------------------------------------------------------------------------------------------------------------------------------------------------------------------------------------------------------------------------------------------------------------------------------------------------------------------------------------------------------------------------------------------------------------------------------------------------------------------------------------------------------------------------------------------------------------------------------------------------------------------------------------------------------------------------------------------------------------------------------------------------------------------------------------------------------------------------------------|



|       |                         |                                                                                                                                                                                                                                                                                                                                                                                                                                                                                                                                                                                                                                                                                                                                                                                                                                                                                                                                                                                                                                                                                                                                                                                                                                                                                                                                                                  |
|-------|-------------------------|------------------------------------------------------------------------------------------------------------------------------------------------------------------------------------------------------------------------------------------------------------------------------------------------------------------------------------------------------------------------------------------------------------------------------------------------------------------------------------------------------------------------------------------------------------------------------------------------------------------------------------------------------------------------------------------------------------------------------------------------------------------------------------------------------------------------------------------------------------------------------------------------------------------------------------------------------------------------------------------------------------------------------------------------------------------------------------------------------------------------------------------------------------------------------------------------------------------------------------------------------------------------------------------------------------------------------------------------------------------|
|       |                         | <p>injured</p> <p>E8358: Fall from a watercraft not otherwise specified, injured person not elsewhere classified</p> <p>E8359: Fall from a watercraft not otherwise specified, injured person not otherwise specified</p> <p>E8361: Machine accident, boat occupant injured</p> <p>E8364: Machine accident, skier injured</p> <p>E8380: Unpowered watercraft accident not elsewhere classified</p> <p>E8381: Powered watercraft accident not elsewhere classified</p> <p>E8383: Watercraft accident, passenger injured</p> <p>E8384: Watercraft accident, skier injured</p> <p>E8385: Watercraft accident, swimmer injured</p> <p>E8388: Watercraft accident, injured person not elsewhere classified</p> <p>E8389: Watercraft accident, injured person not otherwise specified</p> <p>E8409: Powered aircraft take-off/ landing accident, injured person not elsewhere classified</p> <p>E8413: Powered aircraft take-off/ landing accident, passenger injured</p> <p>E8433: Fall from commercial aircraft</p> <p>E8449: Aircraft accident not elsewhere classified, injured person not elsewhere classified</p> <p>E8459: Spacecraft accident, injured person not elsewhere classified</p> <p>E846 : Industrial vehicle accident on premises</p> <p>E847 : Cable car accident not on railway</p> <p>E848 : Other vehicle accident not elsewhere classified</p> |
| Falls | Falls from ground level | <p>E8800: Fall on escalator</p> <p>E8801: Fall on sidewalk curb<sup>b</sup></p> <p>E8809: Fall on stair/step not elsewhere classified</p> <p>E8842: Fall from chair</p> <p>E8843: Fall from wheelchair<sup>b</sup></p> <p>E8844: Fall from bed<sup>b</sup></p> <p>E8845: Fall from furniture not elsewhere classified<sup>b</sup></p> <p>E8846: Fall from commode<sup>b</sup></p> <p>E8849: Fall-1 level to other not elsewhere classified</p> <p>E8850: Fall-nonmotor scooter<sup>c</sup></p> <p>E8851: Fall from roller skates<sup>d</sup></p> <p>E8852: Fall from skateboard<sup>d</sup></p> <p>E8853: Fall from skis<sup>d</sup></p> <p>E8854: Fall from snowboard<sup>d</sup></p> <p>E8859: Fall from slipping not elsewhere classified<sup>d</sup></p> <p>E8860: Fall in sports</p> <p>E8869: Fall on level not elsewhere classified / not otherwise specified</p>                                                                                                                                                                                                                                                                                                                                                                                                                                                                                         |
|       | Falls from height       | <p>E8810: Fall from ladder</p> <p>E8811: Fall from scaffolding</p> <p>E882 : Fall from building</p> <p>E8830: Diving accident</p> <p>E8831: Fall into well</p> <p>E8839: Fall into other hole</p> <p>E8840: Fall from playground equipment</p> <p>E8841: Fall from cliff</p> <p>E9570: Self-inflicted injury jump from residence</p> <p>E9571: Self-inflicted injury jump from other structure</p> <p>E9572: Self-inflicted injury jump from natural site</p> <p>E9579: Self-inflicted injury unspecified jump</p>                                                                                                                                                                                                                                                                                                                                                                                                                                                                                                                                                                                                                                                                                                                                                                                                                                               |

|       |                                  |                                                                                                                                                                                                                                                                                                                                                                                                                                                                                                                                                                                                                                                                                                                                |
|-------|----------------------------------|--------------------------------------------------------------------------------------------------------------------------------------------------------------------------------------------------------------------------------------------------------------------------------------------------------------------------------------------------------------------------------------------------------------------------------------------------------------------------------------------------------------------------------------------------------------------------------------------------------------------------------------------------------------------------------------------------------------------------------|
|       |                                  | E9870: Undetermined circumstance-fall residence<br>E9871: Undetermined fall structure not elsewhere classified<br>E9872: Undetermined fall natural site                                                                                                                                                                                                                                                                                                                                                                                                                                                                                                                                                                        |
|       | Other fall                       | E887 : Fracture, cause not otherwise specified<br>E8880: Fall striking sharp object <sup>e</sup><br>E8881: Fall striking object not elsewhere classified <sup>e</sup><br>E8888: Fall not elsewhere classified <sup>e</sup><br>E8889: Fall not otherwise specified <sup>e</sup><br>E9879: Undetermined circumstance-fall site not otherwise specified                                                                                                                                                                                                                                                                                                                                                                           |
| Misc. | Bite                             | E9060: Dog bite<br>E9061: Rat bite<br>E9062: Nonvenomous snake bite<br>E9063: Animal bite not elsewhere classified<br>E9065: Animal bite not otherwise specified <sup>b</sup><br>E9283: Human bite, accidental <sup>d</sup>                                                                                                                                                                                                                                                                                                                                                                                                                                                                                                    |
|       | Foreign body to the eye          | E914 : Foreign body entering eye                                                                                                                                                                                                                                                                                                                                                                                                                                                                                                                                                                                                                                                                                               |
|       | Striking by object               | E916 : Struck by falling object<br>E9170: Sports accident without subsequent fall<br>E9171: Crowd without subsequent fall<br>E9172: Running water without subsequent fall<br>E9173: Furniture without subsequent fall <sup>e</sup><br>E9174: Stationary object without subsequent fall not elsewhere classified <sup>e</sup><br>E9175: Sports accident with subsequent fall <sup>e</sup><br>E9176: Crowd accident with subsequent fall <sup>e</sup><br>E9177: Furniture accident with subsequent fall <sup>e</sup><br>E9178: Stationary object with subsequent fall not elsewhere classified <sup>e</sup><br>E9179: Object with or without subsequent fall not elsewhere classified<br>E973 : Legal intervention, blunt object |
|       | Cutting/piercing instrument      | E9203: Knife/sword/dagger accident<br>E9205: Accident, hypodermic needle <sup>b</sup><br>E9208: Accident, cutting instrument not elsewhere classified<br>E9209: Accident, cutting instrument not otherwise specified<br>E956 : Self-inflicted injury cutting piercing<br>E966 : Assault, cutting instrument<br>E974 : Legal intervention, cutting instrument<br>E986 : Undetermined circumstance, cutting instrument                                                                                                                                                                                                                                                                                                           |
|       | Explosion or explosive materials | E9210: Boiler explosion<br>E9211: Gas cylinder explosion<br>E9218: Pressure vessel explosion not elsewhere classified<br>E9219: Pressure vessel explosion not otherwise specified<br>E9230: Fireworks accident<br>E9231: Blasting materials accident<br>E9232: Explosive gasses accident<br>E9238: Explosives accident not elsewhere classified<br>E9239: Explosives accident not otherwise specified<br>E9555: Self-inflicted injury, explosives<br>E9658: Assault, explosive not elsewhere classified<br>E9659: Assault, explosive not otherwise specified                                                                                                                                                                   |
|       | Powder gun                       | E9220: Handgun accident<br>E9221: Shotgun accident<br>E9222: Hunting rifle accident<br>E9223: Military firearm accident<br>E9228: Firearm accident not elsewhere classified<br>E9229: Firearm accident not otherwise specified                                                                                                                                                                                                                                                                                                                                                                                                                                                                                                 |

|  |                                                 |                                                                                                                                                                                                                                                                                                                                                                                                                                                                                                                                                                                                                                                                                                                                                                                                                                                                                                         |
|--|-------------------------------------------------|---------------------------------------------------------------------------------------------------------------------------------------------------------------------------------------------------------------------------------------------------------------------------------------------------------------------------------------------------------------------------------------------------------------------------------------------------------------------------------------------------------------------------------------------------------------------------------------------------------------------------------------------------------------------------------------------------------------------------------------------------------------------------------------------------------------------------------------------------------------------------------------------------------|
|  |                                                 | <p>E9287: Accident, mechanism of firearm/gun<sup>a</sup><br/> E9550: Self-inflicted injury handgun<br/> E9551: Self-inflicted injury shotgun<br/> E9552: Self-inflicted injury hunting rifle<br/> E9554: Self-inflicted injury other unspecified firearm<br/> E9650: Assault, handgun<br/> E9651: Assault, shotgun<br/> E9652: Assault, hunting rifle<br/> E9654: Assault, firearm not elsewhere classified<br/> E970 : Legal intervention, firearm<br/> E9854: undetermined circumstance, firearm not elsewhere classified<br/> E9911: War injury: pellets</p>                                                                                                                                                                                                                                                                                                                                         |
|  | Nonpowder gun                                   | <p>E9224: Accident, air gun<sup>f</sup><br/> E9225: Accident, paintball gun<sup>c</sup><br/> E9556: Self-inflicted injury, air gun<br/> E9856: Undetermined accident, air gun<sup>f</sup><br/> E9857: Injury paintball gun not otherwise specified<sup>c</sup></p>                                                                                                                                                                                                                                                                                                                                                                                                                                                                                                                                                                                                                                      |
|  | Accident due to hot/caustic/corrosive substance | <p>E9240: Accident, hot liquid and steam<br/> E9241: Accident, caustic substance<br/> E9242: Accident, hot tap water<sup>b</sup><br/> E9248: Hot substance accident not elsewhere classified<br/> E9249: Hot substance accident not otherwise specified<br/> E9587: Self-inflicted injury by caustic substance except poison<br/> E961: Assault, corrosive/caustic<br/> E972: Legal intervention, gas<br/> E9882: Undetermined circumstance, scald<br/> E9887: Undetermined circumstance, caustic substance</p>                                                                                                                                                                                                                                                                                                                                                                                         |
|  | Violence                                        | <p>E9600: Unarmed fight or brawl<br/> E9601: Rape<br/> E9670: Abuse by father/stepfather/boyfriend<br/> E9671: Child abuse by person not elsewhere classified<br/> E9672: Abuse by mother/stepmother/girlfriend<sup>g</sup><br/> E9673: Battering by spouse/partner<sup>g</sup><br/> E9674: Battering by child<sup>g</sup><br/> E9675: Battering by sibling<sup>g</sup><br/> E9676: Battering by grandparent<sup>g</sup><br/> E9677: Battering by other relative<sup>g</sup><br/> E9678: Battering by non-relative<sup>g</sup><br/> E9679: Child abuse not otherwise specified</p>                                                                                                                                                                                                                                                                                                                      |
|  | Fire/burns                                      | <p>E8900: Private dwelling fire, explosion<br/> E8901: Private dwelling fire, PVC fumes<br/> E8902: Private dwelling fire, fumes not otherwise specified<br/> E8903: Private dwelling fire, burning<br/> E8908: Private dwelling fire, accident not elsewhere classified<br/> E8909: Private dwelling fire, accident not otherwise specified<br/> E8912: Fire in building, fumes not otherwise specified<br/> E8913: Fire in building, burning<br/> E8918: Fire in building, accident not elsewhere classified<br/> E8919: Fire in building, accident not otherwise specified<br/> E892 : Fire not in building<br/> E8930: Clothing fire, private dwelling<br/> E8932: Clothing fire not in building<br/> E8938: Clothing fire not elsewhere classified<br/> E8939: Clothing fire not otherwise specified<br/> E894: Fire, highly inflammable material<br/> E895: Burn accident in private dwelling</p> |

|  |                   |                                                                                                                                                                                                                                                                                                                                                                                                                                                                                                                                                                                                                                                                                                                                                                                                                                                                                                                                                                                                                                                                                                                                                                                                                                                                                                                                                                                                                                                                                                                                                                                                                                                                                                                                                                                                                                                                                                                                                                                                                                                                                                       |
|--|-------------------|-------------------------------------------------------------------------------------------------------------------------------------------------------------------------------------------------------------------------------------------------------------------------------------------------------------------------------------------------------------------------------------------------------------------------------------------------------------------------------------------------------------------------------------------------------------------------------------------------------------------------------------------------------------------------------------------------------------------------------------------------------------------------------------------------------------------------------------------------------------------------------------------------------------------------------------------------------------------------------------------------------------------------------------------------------------------------------------------------------------------------------------------------------------------------------------------------------------------------------------------------------------------------------------------------------------------------------------------------------------------------------------------------------------------------------------------------------------------------------------------------------------------------------------------------------------------------------------------------------------------------------------------------------------------------------------------------------------------------------------------------------------------------------------------------------------------------------------------------------------------------------------------------------------------------------------------------------------------------------------------------------------------------------------------------------------------------------------------------------|
|  |                   | <p>E896: Burn accident in building not elsewhere classified<br/> E897: Burn accident not in building<br/> E8980: Burning bedclothes<br/> E8981: Fire accident not elsewhere classified<br/> E899: Fire accident not otherwise specified<br/> E9581: Self-inflicted injury burns/fire<br/> E9680: Assault, fire<br/> E9881: Undetermined circumstance, burn, fire</p>                                                                                                                                                                                                                                                                                                                                                                                                                                                                                                                                                                                                                                                                                                                                                                                                                                                                                                                                                                                                                                                                                                                                                                                                                                                                                                                                                                                                                                                                                                                                                                                                                                                                                                                                  |
|  | Misc. other       | <p>E9100: Water-skiing accident<br/> E9101: Skin/scuba diving accident<br/> E9102: Swimming accident not otherwise specified<br/> E9103: Swimming/diving accident<br/> E9104: Drowning in bathtub<br/> E9108: Accidental drowning not elsewhere classified<br/> E9109: Accidental drowning not otherwise specified<br/> E911: Respiratory obstruction, food inhalation<br/> E912: Respiratory obstruction, inhalation of object not elsewhere classified<br/> E9130: Suffocation in bed/cradle<br/> E9131: Suffocation, plastic bag<br/> E9133: Cave-in not otherwise specified<br/> E9138: Suffocation not elsewhere classified<br/> E9139: Suffocation not otherwise specified<br/> E9190: Machine accident, agriculture<br/> E9192: Lifting machine accident<br/> E9193: Metal working machine accident<br/> E9194: Woodworking machine accident<br/> E9195: Prime mover machine accident<br/> E9196: Transmission machine accident<br/> E9197: Earth moving machine accident<br/> E9198: Machinery accident not elsewhere classified<br/> E9199: Machinery accident not otherwise specified<br/> E9200: Accident, powered lawn mower<br/> E9201: Accident, power hand tool not elsewhere classified<br/> E9202: Accident, power house appliance<br/> E9250: Domestic wiring accident<br/> E9258: Electrical current accident not elsewhere classified<br/> E9259: Electrical current accident not otherwise specified<br/> E9260: Radiofrequency radiation exposure<br/> E9261: Infra-red appliance radiation exposure<br/> E9262: Visible and ultraviolet light exposure<br/> E9530: Self-inflicted injury hanging<br/> E9538: Self-inflicted injury other strangulation/suffocation<br/> E9539: Self-inflicted injury unspecified strangulation/suffocation<br/> E963: Assault, hanging/strangulation<br/> E964: Assault, submersion<br/> E9830: Undetermined circumstance, hanging<br/> E9838: Undetermined circumstance, suffocation not elsewhere classified<br/> E9839: Undetermined circumstance, suffocation not otherwise specified<br/> E984: Undetermined circumstance, submersion</p> |
|  | Nonspecific other | <p>E0008: External cause status not elsewhere classified<sup>a</sup><br/> E0009: External cause status not otherwise specified<sup>a</sup><br/> E0170: Roller coaster riding<sup>a</sup><br/> E0179: External motion not elsewhere classified<sup>a</sup><br/> E903: Travel and motion<br/> E9040: Abandonment/lack of care<br/> E918: Caught between objects</p>                                                                                                                                                                                                                                                                                                                                                                                                                                                                                                                                                                                                                                                                                                                                                                                                                                                                                                                                                                                                                                                                                                                                                                                                                                                                                                                                                                                                                                                                                                                                                                                                                                                                                                                                     |

|                |                                               |                                                                                                                                                                                                                                                                                                                                                                                                                                                                                                                                                                                                                                                                                                                                                                                                                                                                                                                                                                                                                                        |
|----------------|-----------------------------------------------|----------------------------------------------------------------------------------------------------------------------------------------------------------------------------------------------------------------------------------------------------------------------------------------------------------------------------------------------------------------------------------------------------------------------------------------------------------------------------------------------------------------------------------------------------------------------------------------------------------------------------------------------------------------------------------------------------------------------------------------------------------------------------------------------------------------------------------------------------------------------------------------------------------------------------------------------------------------------------------------------------------------------------------------|
|                |                                               | <p>E9284: External constriction caused by hair<sup>h</sup><br/> E9285: External constriction caused by other object<sup>h</sup><br/> E9288: Accident not elsewhere classified<br/> E9289: Accident not otherwise specified<br/> E9580: Self-inflicted injury moving object<br/> E9588: Self-inflicted injury other specified means<br/> E9589: Self-inflicted injury unspecified means<br/> E975: Legal intervention not elsewhere classified<br/> E976: Legal intervention not otherwise specified<br/> E978: Legal execution<br/> E9880: Undetermined circumstance, moving object<br/> E9888: Undetermined circumstance not elsewhere classified<br/> E9889: Undetermined circumstance not otherwise specified<br/> E0000: Civilian activity, income<sup>a</sup><br/> E0001: Military activity<sup>a</sup><br/> E0002: Volunteer activity<sup>i</sup><br/> E0111: Hand held interactive electronic device<sup>a</sup><br/> E9942: War injury: aircraft collision<sup>a</sup><br/> E9799: Terrorism secondary effects<sup>c</sup></p> |
|                | Unknown (accident by place, if no other code) | <p>E8490: Accident in home<br/> E8491: Accident on farm<br/> E8492: Accident in mine/quarry<br/> E8493: Accident on industrial premises<br/> E8494: Accident in recreational area<br/> E8495: Accident on street/highway<br/> E8496: Accident in public building<br/> E8497: Accident in residential institution<br/> E8498: Accident in place not elsewhere classified<br/> E8499: Accident in place not otherwise specified</p>                                                                                                                                                                                                                                                                                                                                                                                                                                                                                                                                                                                                      |
| <b>Removed</b> |                                               |                                                                                                                                                                                                                                                                                                                                                                                                                                                                                                                                                                                                                                                                                                                                                                                                                                                                                                                                                                                                                                        |
|                | Bug bites                                     | E9064: nonvenomous arthropod bite                                                                                                                                                                                                                                                                                                                                                                                                                                                                                                                                                                                                                                                                                                                                                                                                                                                                                                                                                                                                      |
|                | Exposure                                      | <p>E9000: Excessive heat: weather<br/> E9001: Excessive heat, man-made<br/> E9009: Excessive heat not otherwise specified<br/> E9010: Excessive cold: weather<br/> E9011: Excessive cold, man-made<br/> E9018: Excessive cold not elsewhere classified<br/> E9019: Excessive cold not otherwise specified<br/> E9022: Air pressure change: diving<br/> E9028: Air pressure change, not elsewhere classified<br/> E9029: Air pressure change not otherwise specified<br/> E9043: Exposure not elsewhere classified<br/> E9280: Accident due to weightless environment<br/> E9281: Exposure to noise<br/> E9286: Environmental exposure algae/toxin<sup>j</sup></p>                                                                                                                                                                                                                                                                                                                                                                      |
|                | Severe weather                                | <p>E907: Accident due to lightning<br/> E9081: Accident due to tornado<sup>b</sup><br/> E9088: Accident due to storm not elsewhere classified<sup>b</sup><br/> E9089: Accident due to storm/flood not otherwise specified<sup>b</sup><br/> E9090: Accident due to earthquakes<sup>b</sup><br/> E9091: Accident due to volcanic eruption<sup>b</sup></p>                                                                                                                                                                                                                                                                                                                                                                                                                                                                                                                                                                                                                                                                                |
|                | Foreign body entering orifice not eye         | E915 : Foreign body entering other orifice                                                                                                                                                                                                                                                                                                                                                                                                                                                                                                                                                                                                                                                                                                                                                                                                                                                                                                                                                                                             |
|                | Poisoning                                     | <p>E9620: Assault, poison with medical agent<br/> E9621: Assault, poison with solid/liquid<br/> E9622: Assault, poison with gas/vapor</p>                                                                                                                                                                                                                                                                                                                                                                                                                                                                                                                                                                                                                                                                                                                                                                                                                                                                                              |
|                | Overexertion                                  | E927: Accident from overexertion                                                                                                                                                                                                                                                                                                                                                                                                                                                                                                                                                                                                                                                                                                                                                                                                                                                                                                                                                                                                       |

|  |  |                                                                                                                                                                                                                                                                                                                                                                                                      |
|--|--|------------------------------------------------------------------------------------------------------------------------------------------------------------------------------------------------------------------------------------------------------------------------------------------------------------------------------------------------------------------------------------------------------|
|  |  | E9270: Overexertion, sudden strenuous movement <sup>k</sup><br>E9272: Excess physical exertion <sup>k</sup><br>E9273: Cumulative trauma, repetitive motion <sup>k</sup><br>E9274: Cumulative trauma, repetitive impact <sup>k</sup><br>E9278: Overexertion repetitive movement not elsewhere classified <sup>k</sup><br>E9279: Overexertion repetitive movement not otherwise specified <sup>k</sup> |
|--|--|------------------------------------------------------------------------------------------------------------------------------------------------------------------------------------------------------------------------------------------------------------------------------------------------------------------------------------------------------------------------------------------------------|

<sup>a</sup>Begin 2009, <sup>b</sup>begin 1995, <sup>c</sup>begin 2002, <sup>d</sup>begin 2000, <sup>e</sup>begin 2001, <sup>f</sup>begin 1997, <sup>g</sup>begin 1996, <sup>h</sup>begin 2003, <sup>i</sup>begin 2010, <sup>j</sup>begin 2007, <sup>k</sup>begin 2008

**eTable 3. Mechanism of injury categories and hierarchy**

| Rank | Cause of injury                               |
|------|-----------------------------------------------|
| 1    | Motor vehicle accidents (automobile occupant) |
| 2    | Hit by motor vehicle (includes cyclists hit)  |
| 3    | Non-motorized vehicle accidents               |
| 4    | Other motor vehicle accidents                 |
| 5    | Powder gun                                    |
| 6    | Non powder gun                                |
| 7    | Ball sports                                   |
| 8    | Ball and stick/racquet sports                 |
| 9    | Road sports                                   |
| 10   | Winter sports                                 |
| 11   | Water sports                                  |
| 12   | Sports from height                            |
| 13   | Dance sports                                  |
| 14   | Other sports                                  |
| 15   | Violence                                      |
| 16   | Bite                                          |
| 17   | Animal care                                   |
| 18   | Home activity                                 |
| 19   | Fall from height                              |
| 20   | Fall from ground level                        |
| 21   | Other fall                                    |
| 22   | Fire/burns                                    |
| 23   | Explosion                                     |
| 24   | Hot/corrosive substances                      |
| 25   | Cutting/piercing                              |
| 26   | Foreign body                                  |
| 27   | Strike to eye                                 |
| 28   | Miscellaneous other                           |
| 29   | Other                                         |
| 30   | Unknown                                       |

**eTable 4. Stratification of acute ocular injury International Classification of Diseases, Ninth Revision, Clinical Modification Diagnosis codes by risk of vision loss**

| Risk of Vision Loss | ICD-9 Category                                                                   | ICD-9 codes                                                                                                                                     |
|---------------------|----------------------------------------------------------------------------------|-------------------------------------------------------------------------------------------------------------------------------------------------|
| High                | Disorder of the globe                                                            | 360.00-360.02, 360.44                                                                                                                           |
|                     | Other retinal disorders, retinal detachments and defects, and choroidal disorder | 361.01-361.05, 361.10-361.11, 361.32-361.33, 361.81, 361.89-361.9, 362.30-362.36, 362.40, 362.43, 362.54, 362.81, 363.61-363.63, 363.70, 363.72 |
|                     | Cataract                                                                         | 366.01-366.02, 366.20, 366.22                                                                                                                   |
|                     | Disorder or injury of optic nerve and visual pathways                            | 377.42, 950.0                                                                                                                                   |
|                     | Other disorders of eye                                                           | 379.32-379.33, 379.39                                                                                                                           |

|          |                                                                                   |                                                                             |
|----------|-----------------------------------------------------------------------------------|-----------------------------------------------------------------------------|
|          | Open wound of eyeball                                                             | 871.0-871.3, 871.5-871.7, 871.9                                             |
|          | Burn confined to eye and adnexa                                                   | 940.2, 940.5                                                                |
| Variable | Disorders of the globe                                                            | 360.34                                                                      |
|          | Disorders of the iris and ciliary body                                            | 364.05, 364.23, 364.41                                                      |
|          | Glaucoma                                                                          | 365.61                                                                      |
|          | Cataract                                                                          | 366.21                                                                      |
|          | Corneal opacity, other disorders of the cornea, and keratitis                     | 371.00, 371.03, 371.10, 371.20, 371.22, 371.31-371.33, 371.70, 371.89-379.9 |
|          | Disorders of the orbit                                                            | 376.30, 376.32                                                              |
|          | Other disorders of eye                                                            | 379.23                                                                      |
|          | Open wound of eyeball                                                             | 871.4                                                                       |
|          | Contusion of eye and adnexa                                                       | 921.3, 921.9                                                                |
|          | Burn confined to eye and adnexa                                                   | 940.3-940.4, 940.9                                                          |
|          | Burn of face, head, and neck                                                      | 941.02                                                                      |
| Low      | Disorders of the globe                                                            | 360.30                                                                      |
|          | Other retinal disorders, retinal detachments and defects, and choroidal disorders | 362.37                                                                      |
|          | Disorders of the iris and ciliary body                                            | 364.00, 364.04, 364.75-364.76                                               |
|          | Glaucoma                                                                          | 365.65                                                                      |
|          | Corneal opacity, other disorders of cornea, and keratitis                         | 370.20-370.21, 371.01-371.02                                                |
|          | Disorders of conjunctiva                                                          | 372.71-372.73                                                               |
|          | Inflammation of eyelids                                                           | 373.13                                                                      |
|          | Other disorders of eyelids                                                        | 374.30, 374.81-374.82, 374.86                                               |
|          | Disorders of the lacrimal system                                                  | 375.16, 375.20, 375.22, 375.51, 375.69, 375.89-375.9                        |
|          | Disorders of the orbit                                                            | 376.33, 376.36, 376.40, 376.47, 376.52, 376.89-376.9                        |
|          | Strabismus and other disorders of binocular eye movements                         | 378.60                                                                      |
|          | Other disorders of eye                                                            | 379.8, 379.91-379.93                                                        |
|          | Orbital floor fracture                                                            | 802.6-802.7                                                                 |
|          | Open wound of ocular adnexa                                                       | 870.0-870.4, 870.8-870.9                                                    |
|          | Superficial wound of eye and adnexa                                               | 918.0-918.2, 918.9                                                          |
|          | Contusion of the eye and adnexa                                                   | 921.0-921.2                                                                 |
|          | Foreign body on external eye                                                      | 930.1-930.2, 930.8-930.9                                                    |
|          | Burn confined to eye and adnexa                                                   | 940.0-940.1, 951.22, 941.32                                                 |
|          | Burn of face, head, and neck                                                      | 941.12                                                                      |



**eTable 5. Mechanisms of pediatric acute ocular injuries by risk of vision loss, national estimates, NEDS 2006-2014**

| <b>High-risk</b>                             |                                        |                                        |                                                  |                                        |
|----------------------------------------------|----------------------------------------|----------------------------------------|--------------------------------------------------|----------------------------------------|
|                                              | <b>2014<br/>national<br/>estimates</b> | <b>95%<br/>confidence<br/>interval</b> | <b>Perce<br/>nt<br/>change<br/>from<br/>2006</b> | <b>95%<br/>confidence<br/>interval</b> |
| <b>SPORTS</b>                                | 222                                    | (117 , 327)                            | 40.0                                             | (21.3 , 58.7)                          |
| Road sports                                  | ≤10                                    | (0 , 20)                               | -38.1                                            | (-82.8 , 6.6)                          |
| Winter sports                                | ≤10                                    | (0 , 19)                               |                                                  |                                        |
| Water sports                                 |                                        |                                        |                                                  |                                        |
| Sports from height                           | ≤10                                    | (0 , 13)                               |                                                  |                                        |
| Ball sports                                  | ≤10                                    | (0 , 34)                               | 16.5                                             | (-20.6 , 53.5)                         |
| Ball + stick/racquet sports                  | ≤10                                    | (2 , 43)                               |                                                  |                                        |
| Dance sports / sports from moderate height   |                                        |                                        |                                                  |                                        |
| Strike due to sports                         | ≤10                                    | (0 , 28)                               | -44.2                                            | (-85.9 , -2.5)                         |
| Other sport / physical activity              | 151                                    | (56 , 247)                             | 57.2                                             | (41.9 , 72.5)                          |
| <b>HOUSEHOLD/DOMESTIC</b>                    | 54                                     | (21 , 87)                              | -4.8                                             | (-15.9 , 6.3)                          |
| Animal care                                  | 48                                     | (16 , 80)                              | -0.6                                             | (-11.1 , 10.0)                         |
| Home activities                              | ≤10                                    | (0 , 15)                               | -19.4                                            | (-53.9 , 15.1)                         |
| <b>VEHICLES</b>                              | 53                                     | (19 , 86)                              | -79.8                                            | (-84.8 , -74.9)                        |
| Motor vehicle crashes (automobile occupant)  | ≤10                                    | (4 , 61)                               | -72.1                                            | (-78.7 , -65.5)                        |
| Hit by motor vehicle (includes cyclists hit) | ≤10                                    | (0 , 34)                               | -93.1                                            | (-103.5 , -82.8)                       |
| Non-motorized vehicle crashes                | ≤10                                    | (0 , 13)                               | -79.9                                            | (-87.7 , -72.1)                        |
| Other motorized vehicle crashes              |                                        |                                        |                                                  |                                        |
| <b>FALLS</b>                                 | 171                                    | (95 , 248)                             | -43.1                                            | (-48.9 , -37.4)                        |
| Falls from ground level height               | 83                                     | (33 , 132)                             | -58.1                                            | (-65.5 , -50.7)                        |
| Fall from moderate/great height              | ≤10                                    | (0 , 11)                               | -33.0                                            | (-48.6 , -17.4)                        |
| Other fall                                   | 85                                     | (44 , 126)                             | -17.7                                            | (-25.3 , -10.1)                        |
| <b>MISCELLANEOUS</b>                         | 1,015                                  | (840 , 1190)                           | -57.7                                            | (-60.8 , -54.6)                        |
| Strike to eye                                | 256                                    | (181 , 331)                            | -60.5                                            | (-63.7 , -57.2)                        |
| Foreign body to the eye                      | 118                                    | (71 , 164)                             | -76.8                                            | (-84.8 , -68.8)                        |
| Cutting/piercing instrument                  | 134                                    | (80 , 187)                             | -61.9                                            | (-65.6 , -58.2)                        |
| Chemical or thermal injury to the eye        | 154                                    | (95 , 213)                             | -36.9                                            | (-43.9 , -29.9)                        |
| Bite                                         | ≤10                                    | (4 , 46)                               | -52.6                                            | (-60.8 , -44.3)                        |
| Violence                                     | 240                                    | (140 , 339)                            | -44.5                                            | (-49.4 , -39.6)                        |
| Guns (powder and non-powder)                 | 89                                     | (49 , 129)                             | -68.5                                            | (-73.5 , -63.6)                        |
| <b>OTHER</b>                                 | 302                                    | (226 , 377)                            | 25.2                                             | (18.0 , 32.4)                          |
| <b>UNKNOWN</b>                               | 288                                    | (86 , 489)                             | -58.9                                            | (-66 , -51.8)                          |
| <b>Variable-risk</b>                         |                                        |                                        |                                                  |                                        |
|                                              | <b>2014<br/>National<br/>estimates</b> | <b>95%<br/>confidence<br/>interval</b> | <b>Perce<br/>nt<br/>change<br/>from<br/>2006</b> | <b>95%<br/>confidence<br/>interval</b> |
| <b>SPORTS</b>                                | 3,893                                  | (3135 , 4651)                          | 11.6                                             | (1.2 , 22.0)                           |
| Road sports                                  | 267                                    | (179 , 356)                            | 125.0                                            | (102.1 , 147.9)                        |
| Winter sports                                | ≤10                                    | (6 , 56)                               | -24.8                                            | (-32.6 , -17)                          |
| Water sports                                 | ≤10                                    | (5 , 56)                               | -29.7                                            | (-61.8 , 2.4)                          |
| Sports from height                           | ≤10                                    | (0 , 28)                               |                                                  |                                        |
| Ball sports                                  | 715                                    | (577 , 853)                            | 47.7                                             | (29.9 , 65.4)                          |
| Ball + stick/racquet sports                  | 489                                    | (377 , 601)                            | 21.8                                             | (7.5 , 36.1)                           |
| Dance sports / sports from moderate height   | 60                                     | (29 , 91)                              | 244.2                                            | (134.5 , 353.8)                        |
| Strike due to sports                         | 910                                    | (727 , 1092)                           | -17.8                                            | (-33.3 , -2.4)                         |

|                                              |        |                 |       |                 |
|----------------------------------------------|--------|-----------------|-------|-----------------|
| Other sport / physical activity              | 1,377  | (791 , 1964)    | 12.4  | (2.3 , 22.5)    |
| <b>HOUSEHOLD/DOMESTIC</b>                    | 304    | (218 , 390)     | 156.5 | (125.1 , 187.9) |
| Animal care                                  | 144    | (94 , 194)      | 118.1 | (84.9 , 151.2)  |
| Home activities                              | 160    | (91 , 229)      | 212.0 | (173.2 , 250.7) |
| <b>VEHICLES</b>                              | 619    | (499 , 738)     | -55.2 | (-58.6 , -51.8) |
| Motor vehicle crashes (automobile occupant)  | 396    | (303 , 490)     | -61.8 | (-65.1 , -58.5) |
| Hit by motor vehicle (includes cyclists hit) | 72     | (33 , 111)      | -52.1 | (-58.0 , -46.3) |
| Non-motorized vehicle crashes                | 98     | (55 , 141)      | -41.8 | (-49.9 , -33.8) |
| Other motorized vehicle crashes              | 53     | (20 , 86)       | 2.1   | (-13.0 , 17.2)  |
| <b>FALLS</b>                                 | 1,517  | (1273 , 1762)   | -14.3 | (-17.1 , -11.5) |
| Falls from ground level height               | 753    | (602 , 903)     | -13.5 | (-16.7 , -10.4) |
| Fall from moderate/great height              | 59     | (25 , 92)       | -13.7 | (-20.3 , -7.0)  |
| Other fall                                   | 706    | (559 , 854)     | -15.1 | (-18.5 , -11.7) |
| <b>MISCELLANEOUS</b>                         | 11,697 | (10556 , 12839) | -46.6 | (-48.6 , -44.6) |
| Strike to eye                                | 6,120  | (5394 , 6846)   | -32.8 | (-35.0 , -30.7) |
| Foreign body to the eye                      | 2,616  | (2302 , 2929)   | -53.9 | (-55.7 , -52.2) |
| Cutting/piercing instrument                  | 287    | (211 , 362)     | -49.2 | (-53.3 , -45.0) |
| Chemical or thermal injury to the eye        | 1,376  | (1176 , 1576)   | -65.7 | (-69.0 , -62.4) |
| Bite                                         | 75     | (38 , 111)      | -2.1  | (-12.1 , 7.8)   |
| Violence                                     | 760    | (584 , 935)     | -46.6 | (-48.1 , -45.1) |
| Guns (powder and non-powder)                 | 465    | (342 , 588)     | -65.4 | (-69.2 , -61.6) |
| <b>OTHER</b>                                 | 4,082  | (3047 , 5116)   | 98.5  | (84.0 , 113.1)  |
| <b>UNKNOWN</b>                               | 1,539  | (1043 , 2035)   | -56.2 | (-61.4 , -51.0) |

| Low-risk                                     |                               |                               |                                       |                               |
|----------------------------------------------|-------------------------------|-------------------------------|---------------------------------------|-------------------------------|
|                                              | 2014<br>National<br>estimates | 95%<br>confidence<br>interval | Perce<br>nt<br>change<br>from<br>2006 | 95%<br>confidence<br>interval |
| <b>SPORTS</b>                                | 19,020                        | (16011 , 22028)               | 12.8                                  | (5.8 , 19.7)                  |
| Road sports                                  | 1,961                         | (1607 , 2315)                 | 33.2                                  | (22.7 , 43.7)                 |
| Winter sports                                | 209                           | (133 , 284)                   | 7.4                                   | (-9.6 , 24.5)                 |
| Water sports                                 | 277                           | (198 , 356)                   | 16.6                                  | (3.0 , 30.3)                  |
| Sports from height                           | 97                            | (50 , 143)                    | -25.5                                 | (-44.9 , -6.1)                |
| Ball sports                                  | 3,093                         | (2640 , 3546)                 | 50.6                                  | (43.5 , 57.7)                 |
| Ball + stick/racquet sports                  | 1,872                         | (1555 , 2189)                 | 32.2                                  | (26.5 , 38)                   |
| Dance sports / sports from moderate height   | 282                           | (203 , 360)                   | 23.5                                  | (13.0 , 34.0)                 |
| Strike due to sports                         | 3,770                         | (3255 , 4285)                 | -23.5                                 | (-31.5 , -15.6)               |
| Other sport / physical activity              | 7,460                         | (4976 , 9945)                 | 22.7                                  | (11.9 , 33.5)                 |
| <b>HOUSEHOLD/DOMESTIC</b>                    | 2,577                         | (2302 , 2852)                 | 13.9                                  | (8.5 , 19.4)                  |
| Animal care                                  | 1,847                         | (1620 , 2074)                 | 12.9                                  | (4.9 , 20.8)                  |
| Home activities                              | 730                           | (595 , 865)                   | 16.5                                  | (10.9 , 22.2)                 |
| <b>VEHICLES</b>                              | 5,016                         | (4436 , 5597)                 | -60.0                                 | (-62.5 , -57.5)               |
| Motor vehicle crashes (automobile occupant)  | 3,309                         | (2887 , 3732)                 | -57.6                                 | (-60.1 , -55.1)               |
| Hit by motor vehicle (includes cyclists hit) | 632                           | (498 , 766)                   | -57.5                                 | (-61.9 , -53.2)               |
| Non-motorized vehicle crashes                | 694                           | (567 , 820)                   | -67.1                                 | (-70.1 , -64.0)               |
| Other motorized vehicle crashes              | 382                           | (292 , 472)                   | -66.5                                 | (-71.2 , -61.8)               |
| <b>FALLS</b>                                 | 15,541                        | (13761 , 17320)               | -42.5                                 | (-44.6 , -40.4)               |
| Falls from ground level height               | 6,849                         | (6023 , 7675)                 | -43.6                                 | (-46.1 , -41.1)               |
| Fall from moderate/great height              | 476                           | (374 , 577)                   | -50.7                                 | (-55.0 , -46.4)               |
| Other fall                                   | 8,216                         | (7205 , 9227)                 | -41.0                                 | (-43.0 , -39.0)               |
| <b>MISCELLANEOUS</b>                         | 53,258                        | (48693 , 57823)               | -48.6                                 | (-50.6 , -46.6)               |
| Strike to eye                                | 30,460                        | (27542 , 33378)               | -43.2                                 | (-45.2 , -41.2)               |
| Foreign body to the eye                      | 11,083                        | (10125 , 12041)               | -57.5                                 | (-60.1 , -54.8)               |
| Cutting/piercing instrument                  | 2,604                         | (2250 , 2958)                 | -52.8                                 | (-54.6 , -51.0)               |
| Chemical or thermal injury to the eye        | 2,253                         | (1954 , 2552)                 | -61.2                                 | (-64.1 , -58.3)               |
| Bite                                         | 3,085                         | (2671 , 3499)                 | -28.9                                 | (-32.2 , -25.6)               |
| Violence                                     | 3,176                         | (2749 , 3603)                 | -57.8                                 | (-59.7 , -55.9)               |
| Guns (powder and non-powder)                 | 597                           | (488 , 705)                   | -56.5                                 | (-59.4 , -53.5)               |
| <b>OTHER</b>                                 | 31,200                        | (27864 , 34536)               | 71.8                                  | (62.5 , 81.0)                 |
| <b>UNKNOWN</b>                               | 11,065                        | (8177 , 13954)                | -49.3                                 | (-52.7 , -45.9)               |

Cells with sizes  $\leq 10$  are reported in this way to protect patient confidentiality

**eTable 6. Mechanisms of pediatric acute ocular injuries by age group, national estimates, NEDS 2006-2014**

| <b>Ages 0-4</b>                              |                                        |                                        |                                             |                                        |
|----------------------------------------------|----------------------------------------|----------------------------------------|---------------------------------------------|----------------------------------------|
|                                              | <b>2014<br/>national<br/>estimates</b> | <b>95%<br/>confidence<br/>interval</b> | <b>Percent<br/>change<br/>from<br/>2006</b> | <b>95%<br/>confidence<br/>interval</b> |
| <b>SPORTS</b>                                | 4,781                                  | (3197 , 6366)                          | 25.5                                        | (16.0 , 35.1)                          |
| Road sports                                  | 982                                    | (761 , 1203)                           | 40.7                                        | (32.2 , 49.2)                          |
| Winter sports                                | ≤10                                    | (0 , 54)                               | 24.7                                        | (-37.1 , 86.6)                         |
| Water sports                                 | ≤10                                    | (0 , 27)                               | -61.5                                       | (-91.4 , -31.7)                        |
| Sports from height                           | 57                                     | (18 , 96)                              | -31.6                                       | (-41.8 , -21.4)                        |
| Ball sports                                  | ≤10                                    | (0 , 28)                               | -3.4                                        | (-39.5 , 32.8)                         |
| Ball + stick/racquet sports                  | 51                                     | (20 , 82)                              | 39.2                                        | (-6.9 , 85.2)                          |
| Dance sports / sports from moderate height   | 37                                     | (13 , 62)                              | -20.1                                       | (-31.7 , -8.6)                         |
| Strike due to sports                         | 176                                    | (115 , 237)                            | 37.4                                        | (12.7 , 62.1)                          |
| Other sport / physical activity              | 3,427                                  | (1928 , 4926)                          | 25.4                                        | (12.0 , 38.8)                          |
| <b>HOUSEHOLD/DOMESTIC</b>                    | 1,181                                  | (1004 , 1358)                          | 17.2                                        | (12.9 , 21.5)                          |
| Animal care                                  | 765                                    | (633 , 898)                            | 21.8                                        | (14.1 , 29.4)                          |
| Home activities                              | 415                                    | (306 , 525)                            | 9.3                                         | (4.9 , 13.6)                           |
| <b>VEHICLES</b>                              | 779                                    | (602 , 955)                            | -50.8                                       | (-52.6 , -49.0)                        |
| Motor vehicle crashes (automobile occupant)  | 488                                    | (355 , 621)                            | -50.3                                       | (-52.3 , -48.4)                        |
| Hit by motor vehicle (includes cyclists hit) | 97                                     | (54 , 141)                             | -41.5                                       | (-45.9 , -37.1)                        |
| Non-motorized vehicle crashes                | 119                                    | (71 , 167)                             | -59.3                                       | (-63.9 , -54.8)                        |
| Other motorized vehicle crashes              | 74                                     | (36 , 111)                             | -43.3                                       | (-50.8 , -35.7)                        |
| <b>FALLS</b>                                 | 11,140                                 | (9821 , 12459)                         | -41.4                                       | (-43.4 , -39.4)                        |
| Falls from ground level height               | 4,936                                  | (4325 , 5547)                          | -39.2                                       | (-41.4 , -36.9)                        |
| Fall from moderate/great height              | 249                                    | (179 , 319)                            | -50.5                                       | (-55.6 , -45.5)                        |
| Other fall                                   | 5,955                                  | (5168 , 6741)                          | -42.6                                       | (-44.6 , -40.6)                        |
| <b>MISCELLANEOUS</b>                         | 21,858                                 | (19541 , 24174)                        | -43.8                                       | (-45.6 , -41.9)                        |
| Strike to eye                                | 13,093                                 | (11616 , 14570)                        | -40.1                                       | (-41.9 , -38.3)                        |
| Foreign body to the eye                      | 3,519                                  | (3088 , 3950)                          | -52.0                                       | (-54.2 , -49.8)                        |
| Cutting/piercing instrument                  | 1,155                                  | (965 , 1345)                           | -50.4                                       | (-52.4 , -48.4)                        |
| Chemical or thermal injury to the eye        | 1,936                                  | (1669 , 2202)                          | -56.0                                       | (-58.9 , -53.0)                        |
| Bite                                         | 1,639                                  | (1366 , 1911)                          | -27.4                                       | (-30.9 , -24.0)                        |
| Violence                                     | 453                                    | (293 , 614)                            | -37.2                                       | (-40.4 , -33.9)                        |
| Guns (powder and non-powder)                 | 63                                     | (23 , 103)                             | -30.3                                       | (-37.7 , -22.9)                        |
| <b>OTHER</b>                                 | 13,742                                 | (11990 , 15495)                        | 62.8                                        | (54.9 , 70.7)                          |
| <b>UNKNOWN</b>                               | 4,216                                  | (2772 , 5660)                          | -49.5                                       | (-53.6 , -45.4)                        |
| <b>Ages 5-9</b>                              |                                        |                                        |                                             |                                        |
|                                              | <b>2014<br/>national<br/>estimates</b> | <b>95%<br/>confidence<br/>interval</b> | <b>Percent<br/>change<br/>from<br/>2006</b> | <b>95%<br/>confidence<br/>interval</b> |
| <b>SPORTS</b>                                | 5,362                                  | (4362 , 6363)                          | 26.0                                        | (16.4 , 35.5)                          |
| Road sports                                  | 718                                    | (566 , 870)                            | 57.9                                        | (40.9 , 74.9)                          |
| Winter sports                                | 102                                    | (60 , 144)                             | 20.1                                        | (-6.3 , 46.5)                          |
| Water sports                                 | 138                                    | (86 , 191)                             | 25.0                                        | (3.1 , 46.8)                           |
| Sports from height                           | ≤10                                    | (5 , 51)                               | -23.3                                       | (-35.9 , -10.6)                        |
| Ball sports                                  | 424                                    | (310 , 538)                            | 92.3                                        | (75.0 , 109.5)                         |
| Ball + stick/racquet sports                  | 489                                    | (354 , 623)                            | 14.2                                        | (2.0 , 26.4)                           |
| Dance sports / sports from moderate height   | 102                                    | (59 , 144)                             | 11.9                                        | (-3.4 , 27.2)                          |
| Strike due to sports                         | 831                                    | (669 , 992)                            | -21.2                                       | (-31.2 , -11.1)                        |
| Other sport / physical activity              | 2,531                                  | (1689 , 3373)                          | 44.4                                        | (29.6 , 59.2)                          |
| <b>HOUSEHOLD/DOMESTIC</b>                    | 882                                    | (739 , 1024)                           | 24.7                                        | (15.9 , 33.4)                          |

|                                              |        |                 |       |                 |
|----------------------------------------------|--------|-----------------|-------|-----------------|
| Animal care                                  | 737    | (608 , 867)     | 18.9  | (10.8 , 26.9)   |
| Home activities                              | 144    | (91 , 197)      | 67.0  | (53.1 , 80.9)   |
| <b>VEHICLES</b>                              | 1,420  | (1208 , 1632)   | -52.5 | (-55.0 , -50.0) |
| Motor vehicle crashes (automobile occupant)  | 865    | (699 , 1031)    | -42.3 | (-45.5 , -39.0) |
| Hit by motor vehicle (includes cyclists hit) | 146    | (88 , 204)      | -57.6 | (-64.9 , -50.3) |
| Non-motorized vehicle crashes                | 309    | (228 , 389)     | -63.4 | (-67.2 , -59.5) |
| Other motorized vehicle crashes              | 100    | (58 , 143)      | -68.8 | (-73.2 , -64.4) |
| <b>FALLS</b>                                 | 4,063  | (3538 , 4588)   | -33.6 | (-36.5 , -30.6) |
| Falls from ground level height               | 1,788  | (1500 , 2076)   | -38.7 | (-42.7 , -34.7) |
| Fall from moderate/great height              | 219    | (153 , 285)     | -41.9 | (-46.1 , -37.7) |
| Other fall                                   | 2,056  | (1762 , 2351)   | -27.6 | (-30.0 , -25.1) |
| <b>MISCELLANEOUS</b>                         | 20,562 | (18688 , 22436) | -39.3 | (-41.4 , -37.1) |
| Strike to eye                                | 13,415 | (12067 , 14762) | -32.0 | (-34.1 , -29.8) |
| Foreign body to the eye                      | 4,000  | (3595 , 4406)   | -53.5 | (-56.0 , -50.9) |
| Cutting/piercing instrument                  | 996    | (833 , 1160)    | -48.0 | (-50.8 , -45.1) |
| Chemical or thermal injury to the eye        | 671    | (541 , 801)     | -56.4 | (-60.3 , -52.4) |
| Bite                                         | 969    | (797 , 1140)    | -32.6 | (-36.4 , -28.7) |
| Violence                                     | 236    | (153 , 319)     | -32.5 | (-40.2 , -24.8) |
| Guns (powder and non-powder)                 | 275    | (201 , 350)     | -46.2 | (-50.8 , -41.6) |
| <b>OTHER</b>                                 | 8,998  | (7809 , 10188)  | 121.3 | (109.0 , 133.6) |
| <b>UNKNOWN</b>                               | 3,155  | (2148 , 4161)   | -44.8 | (-50.3 , -39.3) |

| Ages 10-14                                   |                               |                               |                                   |                               |
|----------------------------------------------|-------------------------------|-------------------------------|-----------------------------------|-------------------------------|
|                                              | 2014<br>national<br>estimates | 95%<br>confidence<br>interval | Percent<br>change<br>from<br>2006 | 95%<br>confidence<br>interval |
| <b>SPORTS</b>                                | 7,068                         | (6230 , 7907)                 | 9.7                               | (0.9 , 18.6)                  |
| Road sports                                  | 302                           | (222 , 382)                   | 17.2                              | (-4.6 , 39.0)                 |
| Winter sports                                | 87                            | (43 , 131)                    | 26.3                              | (-2.4 , 55.1)                 |
| Water sports                                 | 84                            | (43 , 125)                    | 9.1                               | (-22.4 , 40.5)                |
| Sports from height                           | ≤10                           | (4 , 46)                      | 81.3                              | (-2.7 , 165.4)                |
| Ball sports                                  | 1,549                         | (1288 , 1811)                 | 65.7                              | (53.9 , 77.6)                 |
| Ball + stick/racquet sports                  | 1,176                         | (956 , 1396)                  | 28.9                              | (22.6 , 35.3)                 |
| Dance sports / sports from moderate height   | 131                           | (81 , 182)                    | 102.2                             | (86.4 , 118)                  |
| Strike due to sports                         | 2,029                         | (1710 , 2348)                 | -21.6                             | (-33.4 , -9.8)                |
| Other sport / physical activity              | 1,685                         | (1223 , 2146)                 | 14.2                              | (6.8 , 21.5)                  |
| <b>HOUSEHOLD/DOMESTIC</b>                    | 586                           | (478 , 695)                   | 24.8                              | (21.2 , 28.3)                 |
| Animal care                                  | 406                           | (316 , 496)                   | 22.5                              | (16.6 , 28.4)                 |
| Home activities                              | 180                           | (120 , 241)                   | 30.3                              | (28.0 , 32.6)                 |
| <b>VEHICLES</b>                              | 1,341                         | (1120 , 1562)                 | -61.3                             | (-64.2 , -58.4)               |
| Motor vehicle crashes (automobile occupant)  | 780                           | (628 , 933)                   | -59.3                             | (-61.7 , -56.8)               |
| Hit by motor vehicle (includes cyclists hit) | 199                           | (136 , 263)                   | -54.3                             | (-58.0 , -50.6)               |
| Non-motorized vehicle crashes                | 242                           | (175 , 310)                   | -70.3                             | (-76.5 , -64.1)               |
| Other motorized vehicle crashes              | 119                           | (71 , 167)                    | -60.5                             | (-65.0 , -56.0)               |
| <b>FALLS</b>                                 | 1,241                         | (1064 , 1418)                 | -44.7                             | (-47.2 , -42.2)               |
| Falls from ground level height               | 607                           | (487 , 727)                   | -50.9                             | (-53.5 , -48.3)               |
| Fall from moderate/great height              | 50                            | (20 , 80)                     | -56.8                             | (-64.3 , -49.2)               |
| Other fall                                   | 584                           | (478 , 689)                   | -35.8                             | (-38.5 , -33.1)               |
| <b>MISCELLANEOUS</b>                         | 13,777                        | (12621 , 14933)               | -54.0                             | (-56.3 , -51.8)               |
| Strike to eye                                | 7,047                         | (6357 , 7738)                 | -49.6                             | (-51.7 , -47.5)               |
| Foreign body to the eye                      | 3,392                         | (3051 , 3733)                 | -59.4                             | (-62.1 , -56.7)               |
| Cutting/piercing instrument                  | 542                           | (432 , 653)                   | -56.7                             | (-59.9 , -53.6)               |
| Chemical or thermal injury to the eye        | 567                           | (453 , 682)                   | -69.1                             | (-72.2 , -66.0)               |
| Bite                                         | 435                           | (345 , 526)                   | -25.7                             | (-29.7 , -21.6)               |
| Violence                                     | 1,283                         | (1035 , 1532)                 | -52.4                             | (-54.9 , -49.8)               |
| Guns (powder and non-powder)                 | 510                           | (406 , 613)                   | -63.7                             | (-66.8 , -60.7)               |
| <b>OTHER</b>                                 | 7,044                         | (6121 , 7967)                 | 78.9                              | (67.5 , 90.3)                 |
| <b>UNKNOWN</b>                               | 2,584                         | (1954 , 3214)                 | -51.0                             | (-54.4 , -47.5)               |

| Ages 15-17                                   |                               |                               |                                   |                               |
|----------------------------------------------|-------------------------------|-------------------------------|-----------------------------------|-------------------------------|
|                                              | 2014<br>national<br>estimates | 95%<br>confidence<br>interval | Percent<br>change<br>from<br>2006 | 95%<br>confidence<br>interval |
| <b>SPORTS</b>                                | 5,922                         | (5262 , 6582)                 | -1.2                              | (-6.2 , 3.8)                  |
| Road sports                                  | 233                           | (163 , 303)                   | 30.3                              | (12.1 , 48.5)                 |
| Winter sports                                | 34                            | (10 , 57)                     | -44.5                             | (-69.6 , -19.3)               |
| Water sports                                 | 72                            | (36 , 109)                    | 16.9                              | (-1.5 , 35.4)                 |
| Sports from height                           | ≤10                           | (0 , 11)                      | -44.6                             | (-111.4 , 22.2)               |
| Ball sports                                  | 1,837                         | (1579 , 2095)                 | 32.2                              | (25.1 , 39.3)                 |
| Ball + stick/racquet sports                  | 668                           | (535 , 801)                   | 52.2                              | (41.8 , 62.6)                 |
| Dance sports / sports from moderate height   | 71                            | (35 , 108)                    | 84.7                              | (53.3 , 116.1)                |
| Strike due to sports                         | 1,657                         | (1411 , 1903)                 | -26.5                             | (-34.7 , -18.3)               |
| Other sport / physical activity              | 1,346                         | (925 , 1767)                  | -8.7                              | (-18.4 , 1.0)                 |
| <b>HOUSEHOLD/DOMESTIC</b>                    | 286                           | (213 , 359)                   | 16.8                              | (-2.3 , 35.9)                 |
| Animal care                                  | 130                           | (84 , 176)                    | -21.8                             | (-40.0 , -3.6)                |
| Home activities                              | 156                           | (101 , 211)                   | 65.7                              | (30.2 , 101.1)                |
| <b>VEHICLES</b>                              | 2,148                         | (1889 , 2407)                 | -66.0                             | (-69.3 , -62.7)               |
| Motor vehicle crashes (automobile occupant)  | 1,604                         | (1405 , 1804)                 | -66.0                             | (-69.3 , -62.8)               |
| Hit by motor vehicle (includes cyclists hit) | 277                           | (195 , 358)                   | -64.6                             | (-69.8 , -59.3)               |
| Non-motorized vehicle crashes                | 126                           | (75 , 177)                    | -64.8                             | (-69.4 , -60.3)               |
| Other motorized vehicle crashes              | 141                           | (91 , 192)                    | -69.1                             | (-75.2 , -63.1)               |
| <b>FALLS</b>                                 | 785                           | (650 , 921)                   | -53.4                             | (-55.8 , -51.0)               |
| Falls from ground level height               | 353                           | (272 , 435)                   | -63.1                             | (-66.4 , -59.8)               |
| Fall from moderate/great height              | 20                            | (0 , 39)                      | -60.3                             | (-69.3 , -51.3)               |
| Other fall                                   | 413                           | (319 , 507)                   | -41.8                             | (-44.9 , -38.7)               |
| <b>MISCELLANEOUS</b>                         | 9,773                         | (9041 , 10505)                | -62.8                             | (-65.0 , -60.6)               |
| Strike to eye                                | 3,280                         | (2923 , 3638)                 | -60.3                             | (-62.6 , -58.0)               |
| Foreign body to the eye                      | 2,905                         | (2622 , 3188)                 | -64.2                             | (-67.2 , -61.1)               |
| Cutting/piercing instrument                  | 330                           | (259 , 401)                   | -66.9                             | (-70.4 , -63.4)               |
| Chemical or thermal injury to the eye        | 610                           | (500 , 720)                   | -75.6                             | (-79.5 , -71.6)               |
| Bite                                         | 142                           | (91 , 193)                    | -22.2                             | (-27.2 , -17.3)               |
| Violence                                     | 2,203                         | (1917 , 2489)                 | -60.6                             | (-62.1 , -59.1)               |
| Guns (powder and non-powder)                 | 303                           | (222 , 383)                   | -67.9                             | (-72.0 , -63.8)               |
| <b>OTHER</b>                                 | 5,799                         | (5180 , 6417)                 | 41.6                              | (31.8 , 51.5)                 |
| <b>UNKNOWN</b>                               | 2,937                         | (2438 , 3436)                 | -55.4                             | (-57.6 , -53.2)               |

Cells with sizes ≤10 are reported in this way to protect patient confidentiality
